# Supplementary material for: Swimming kinematics and performance of spinal transected lampreys with different levels of axon regeneration
Source: Oxford University Press journal article supplement (doi:10.1242/jeb.242639), 2021-10-11
Supplement: jeb242639supp.pdf [file jeb242639supp.pdf]

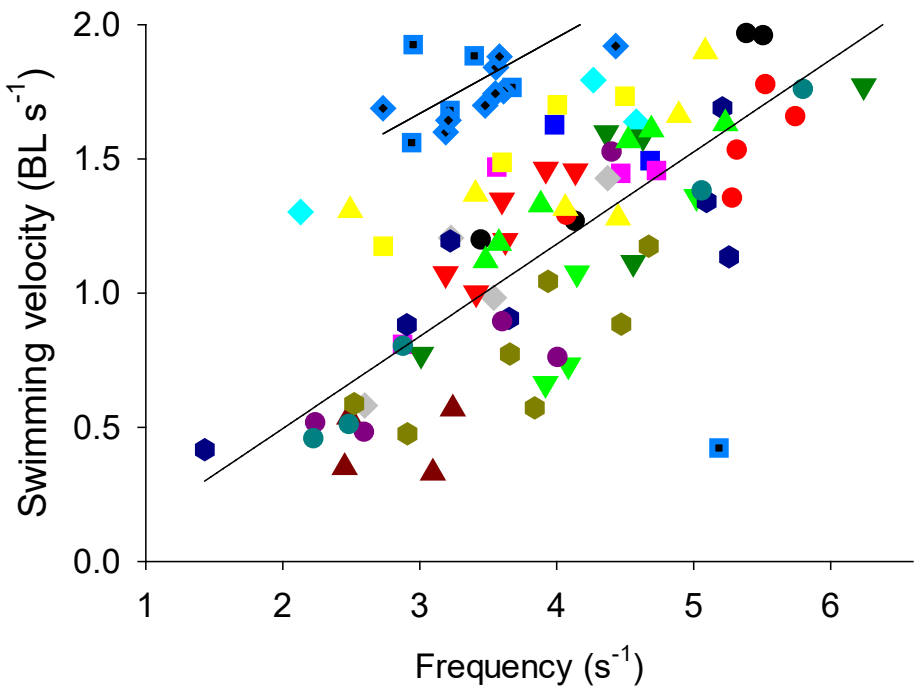

**Fig. S1.** Wave frequency versus swimming speed of individual swimming sequences. Replicate swim sequences of each individual are indicated by color. Blue are control lampreys with each individual having a different shape.

**Table S1.** Multiple regression for swimming speed as a function of tail beat frequency and regeneration percentage.

| <i>Effect</i>                       | $\chi^2$    | <i>df</i> | <i>P</i>         |
|-------------------------------------|-------------|-----------|------------------|
| <b>Frequency</b>                    | <b>77.9</b> | <b>1</b>  | <b>&lt;0.001</b> |
| Regeneration percentage             | 0.2         | 1         | 0.65             |
| Frequency × Regeneration percentage | 0.02        | 1         | 0.88             |

n = 83. Individual animal was included as a random effect in the model.
